# Supplementary material for: Preferences of Type 1 Diabetic Patients on Devices for Islet Transplantation
Source: PubMed Central journal article supplement — Cell Transplant. 2020 Oct 6;29:0963689720952343. doi: 10.1177/0963689720952343 (PMC7784499; doi:10.1177/0963689720952343), 2020-10-06
Supplement: Supplementary_Info.pdf [file Supplementary_Info.pdf]

# Supplementary Information

## Preferences of Type 1 Diabetic Patients on Devices for Islet Transplantation

M. Rezaa Mohammadi<sup>1,2,\*</sup>, Farideh Dehkordi-Vakil<sup>3</sup>, Joni Ricks-Oddie<sup>3</sup>, Robert Mansfield<sup>5</sup>, Himala Kashimiri<sup>4</sup>, Mark Daniels<sup>4</sup>, Weian Zhao<sup>2,6</sup>, Jonathan RT Lakey<sup>2,7,\*</sup>

<sup>1</sup>Department of Materials Science and Engineering, University of California, Irvine, CA, 92697, USA.

<sup>2</sup>Sue and Bill Gross Stem Cell Research Center, University of California, Irvine, CA, 92617, USA.

<sup>3</sup>Center for Statistical Consulting, Department of Statistics, University of California, Irvine, CA, 92617, USA.

<sup>4</sup>CHOC Children's Endocrine & Diabetes Center, 1201 W. La Veta, Orange, CA, 92868, USA

<sup>5</sup>Juvenile Diabetes Research Foundation Orange County Chapter, Irvine, CA 92606

<sup>6</sup>Department of Pharmaceutical Sciences; Chao Family Comprehensive Cancer Center; Edwards Life Sciences Center for Advanced Cardiovascular Technology; Department of Biomedical Engineering; Department of Biological Chemistry, University of California, Irvine, Irvine, CA 92697, USA

<sup>7</sup>Department of Surgery and Biomedical Engineering, University of California Irvine, Orange, CA, 92868, USA

\*Correspondence should be addressed to RM ([rezamoha@uci.edu](mailto:rezamoha@uci.edu)) and JRTL ([jlakey@uci.edu](mailto:jlakey@uci.edu))

Dear participant,

One way to treat Type 1 Diabetes (T1D) is by transplanting insulin producing cells known as islets. Ongoing Clinical Trials on implanting insulin secreting cells inside implants show promising results to treat Type 1 Diabetes (T1D). This survey is to help researchers understand your preferences in designing these implants. Your answers to the following questions will help us to design an implant based on your preferences.

**Age:**

**Gender:**

**How long were you diagnosed?**

1. What type of treatment are you using?  
**a.** Insulin pump    **b.** Continuous Glucose Monitor (CGM)    **c.** Both CGM and insulin pump    **d.** Glucose meter  
**e.** Inhalable insulin    **e.** Multiple Dose Injection (MDI)    **f.** Others (please specify)
  
2. If you receive an implant containing insulin secreting cells, where do you prefer it to be? (Assume that size and shape are comfortable in each case)  
**a.** under the skin    **b.** In your abdomen    **c.** Outside your body    **d.** Others (please specify)
  
3. In each of the abovementioned locations, what shape and size do you prefer?  
**a.** Multiple microscopic small disks deposited in a fluid    **b.** A thin device (soft and size of the credit card)    **c.** Rod shaped device (Size of a 3" pencil)    **d.** Others (please specify)
  
4. How much do you care about the visibility of the implant on your body?  
**a.** Not at all    **b.** Prefer it to be as small as possible    **c.** Not visible at all
  
5. Type 1 Diabetes is an autoimmune disease, where your immune system is dysregulated. Which implant option do you prefer?  
**a.** An implant that only regulates my glucose level  
**b.** An implant that not only controls my glucose but also capable of regulating my immune system to a healthy state
  
6. Do you prefer to receive an implant fabricated with your own stem cells?  
**a.** Yes    **b.** No

We appreciate you time and participation.
